# Supplementary material
Source: publisher figshare collection journal article supplement (https://acs.figshare.com/ndownloader/files/4679416)
Supplement: Supplementary file 1 [file 4679416]

Supproting Information

Control of Electron Transport by Manipulating

the Conjugated Framework

*Sang Uck Lee*, Rodion V. Belosludov, Hiroshi Mizuseki, and Yoshiyuki Kawazoe*

Institute for Materials Research, Tohoku University, Sendai, 980-8577, Japan

E-mail: sulee@imr.edu

**Complete Ref 55**

1. Frisch, M. J.; Trucks, G. W.; Schlegel, H. B.; Scuseria, G. E.; Robb, M. A.; Cheeseman, J. R.; Montgomery, J. A.; Vreven, Jr., T.; Kudin, K. N.; Burant, J. C.; Millam, J. M.; Iyengar, S. S.; Tomasi, J.; Barone, V.; Mennucci, B.; Cossi, M.; Scalmani, G.; Rega, N.; Petersson, G. A.; Nakatsuji, H.; Hada, M.; Ehara, M.; Toyota, K.; Fukuda, R.; Hasegawa, J.; Ishida, M.; Nakajima, T.; Honda, Y.; Kitao, O.; Nakai, H.; Klene, M.; Li, X.; Knox, J. E.; Hratchian, H. P.; Cross, J. B.; Adamo, C.; Jaramillo, J.; Gomperts, R.; Stratmann, R. E.; Yazyev, O.; Austin, A. J.; Cammi, R.; Pomelli, C.; Ochterski, J. W.; Ayala, P. Y.; Morokuma, K.; Voth, G. A.; Salvador, P.; Dannenberg, J. J.; Zakrzewski, V. G.; Dapprich, S.; Daniels, A. D.; Strain, M. C.; Farkas, O.; Malick, D. K.; Rabuck, A. D.; Raghavachari, K.; Foresman, J. B.; Ortiz, J. V.; Cui, Q.; Baboul, A. G.; Clifford, S.; Cioslowski, J.; Stefanov, B. B.; Liu, G.; Liashenko, A.; Piskorz, P.; Komaromi, I.; Martin, R. L.; Fox, D. J.; Keith, T.; Al-Laham, T. A.; Peng, C. Y.; Nanayakkara, A.; Challacombe, M.; Gill, P. M. W.; Johnson, B.; Chen, W.; Wong, M. W.; Gonzalez, C.; Pople, J. A. *GAUSSIAN 03*, *Revision C.02*, *Gaussian, Inc., Pittsburgh*, PA, 2004.

**Bias (Volts)**


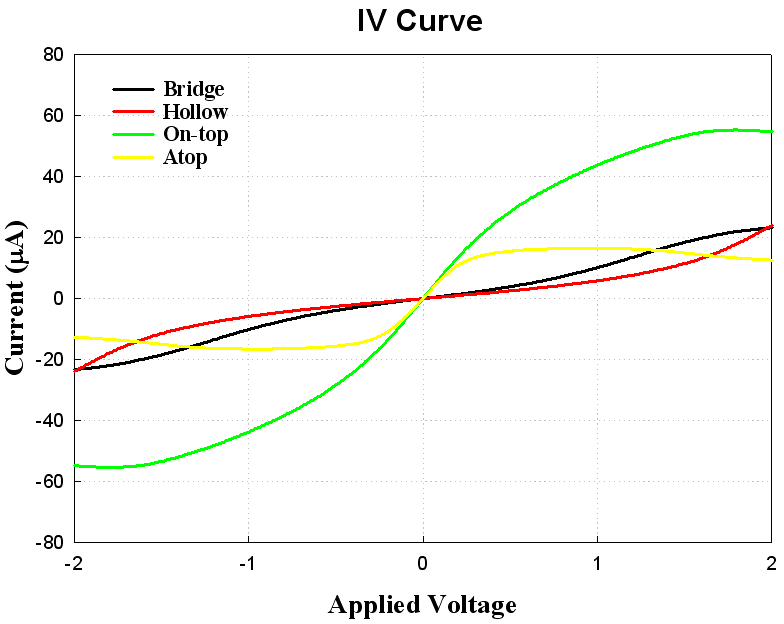


**Figure S1.** I-V characteristics at the four different contact configurations; Bridge, hollow, on-top and atop.

**0**

**1**

**2**

**3**

**4**

**-4**

**-3**

**-2**

**-1**

**Energy, E-Ef(eV)**

**Transmission**

**1.5**

**1.0**

**0.5**

**0.0**

**PDOS**

**0.0**

**0.5**

**1.0**

**1.5**

**2.0**

**2.5**

**3.0**

**3.5**

**4.0**

**4.5**


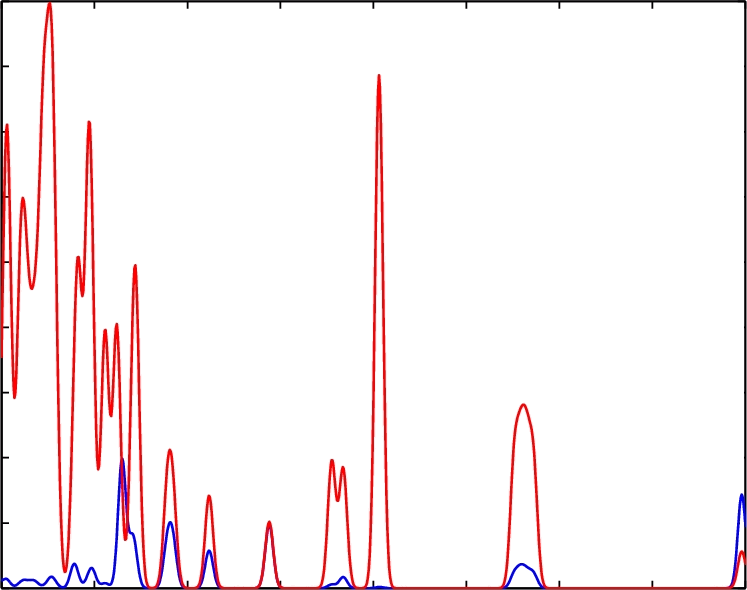

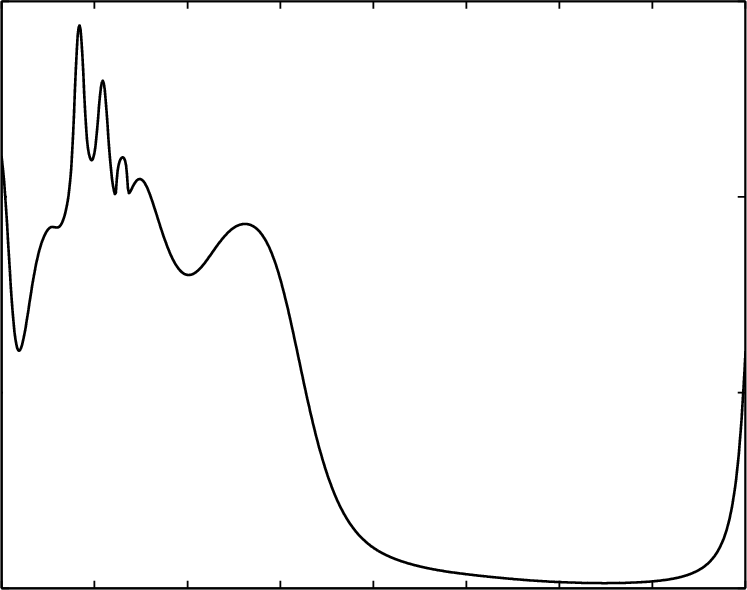


**PDT**

**Au**

**T(E,V=0)**


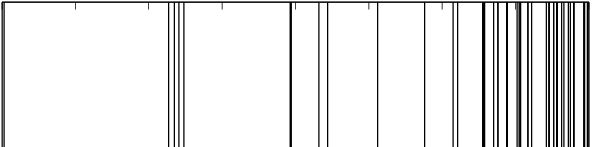


**HOMO**

**LUMO**

**Isolated extended model**

**Coupled extended model**

**0**

**1**

**2**

**3**

**4**

**-4**

**-3**

**-2**

**-1**

**0**

**1**

**2**

**3**

**4**

**-4**

**-3**

**-2**

**-1**


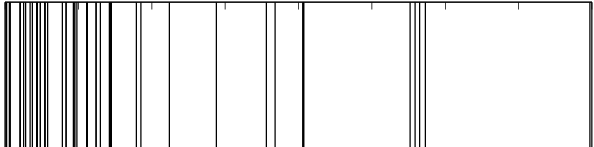

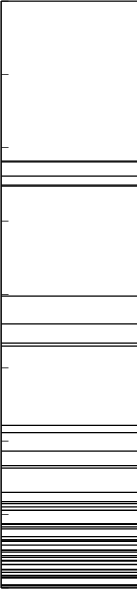

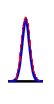

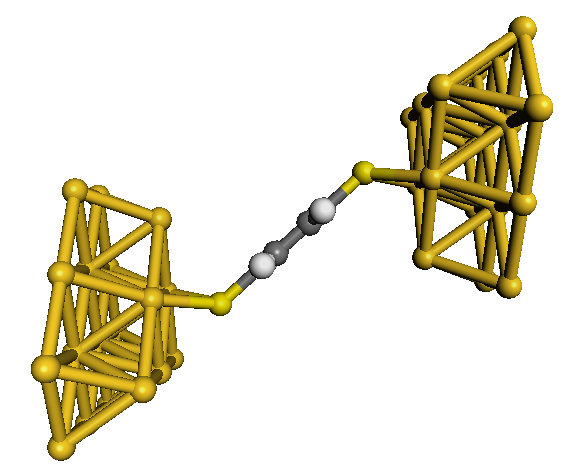


**Figure S2.** Energy level diagrams of the isolated extended model (upper) and the coupled extended model (lower) and equilibrium transmission curves, T(E,V=0), with partial density of state (PDOS) of phenyl dithiol (PDT) at the “bridge” configuration (optimized structure).

**0**

**1**

**2**

**3**

**4**

**-4**

**-3**

**-2**

**-1**

**0**

**1**

**2**

**3**

**4**

**-4**

**-3**

**-2**

**-1**


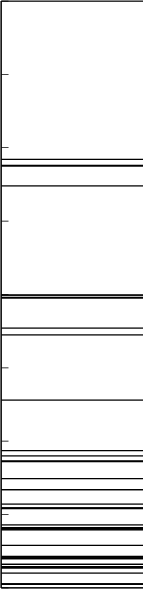

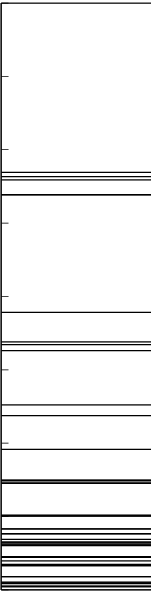

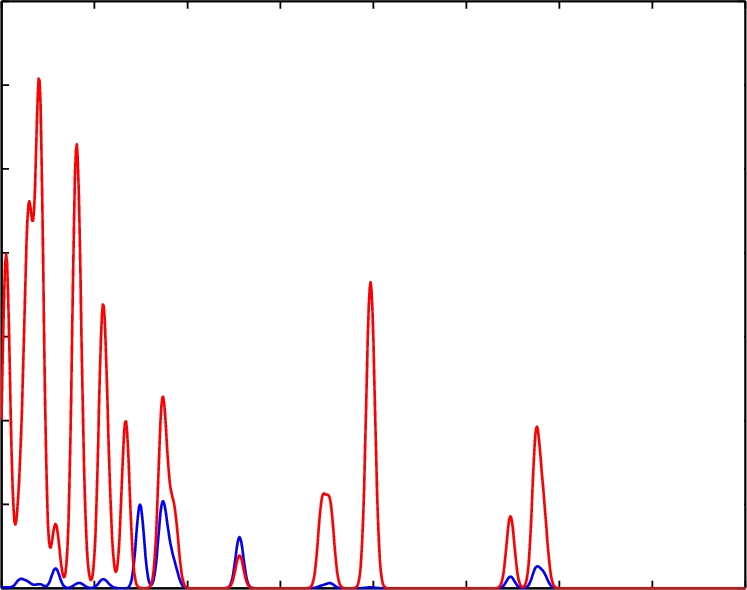

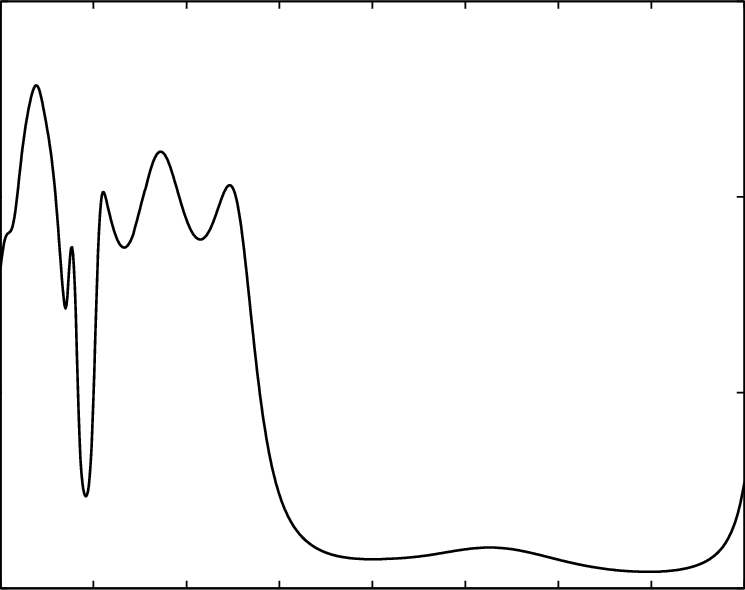


**0**

**1**

**2**

**3**

**4**

**-4**

**-3**

**-2**

**-1**

**Energy, E-Ef(eV)**

**Transmission**

**1.5**

**1.0**

**0.5**

**0.0**

**PDT**

**Au**

**T(E,V=0)**

**PDOS**

**0**

**1**

**2**

**3**

**4**

**5**

**6**

**7**


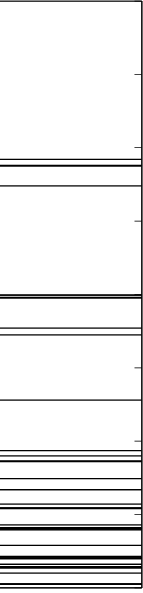

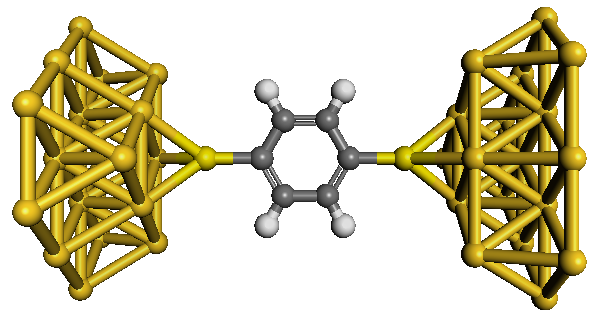


**HOMO**

**Isolated extended model**

**Coupled extended model**

**Figure S3.** Energy level diagrams of the isolated extended model (upper) and the coupled extended model (lower) and equilibrium transmission curves, T(E,V=0), with partial density of state (PDOS) of PDT at the “Hollow” configuration.


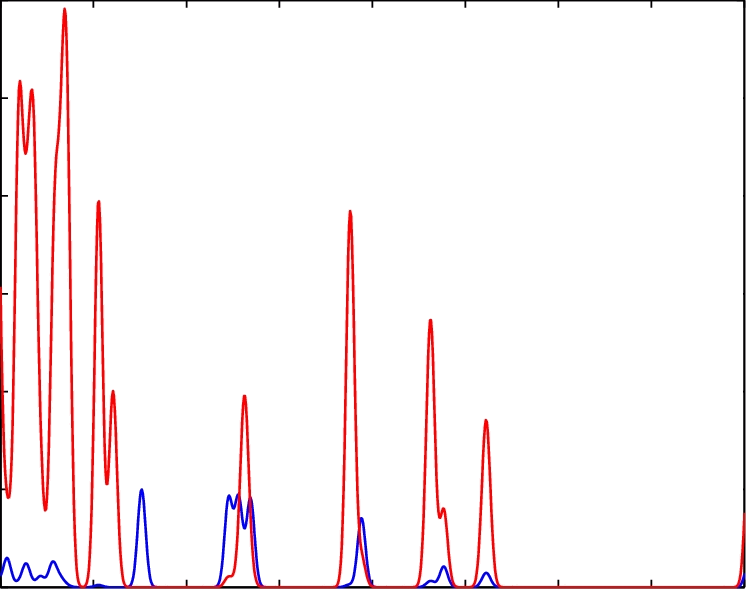

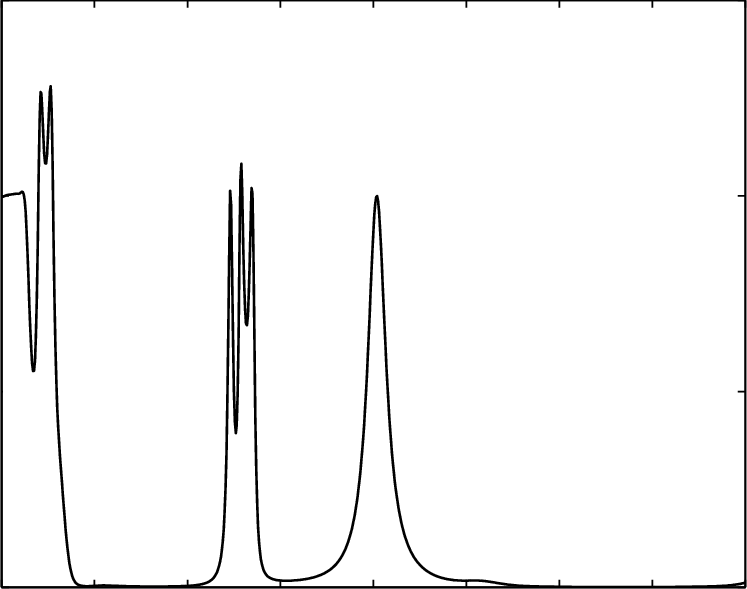


**0**

**1**

**2**

**3**

**4**

**-4**

**-3**

**-2**

**-1**

**Energy, E-Ef(eV)**

**Transmission**

**1.5**

**1.0**

**0.5**

**0.0**

**PDOS**

**0**

**1**

**2**

**3**

**4**

**5**

**6**

**PDT**

**Au**

**T(E,V=0)**


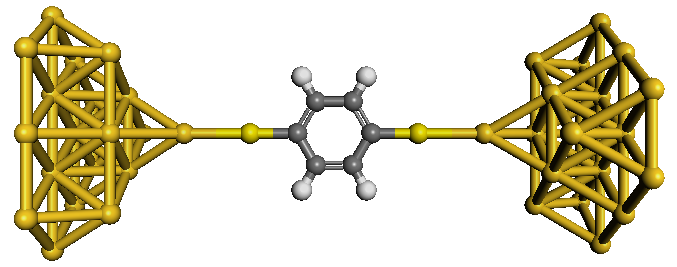

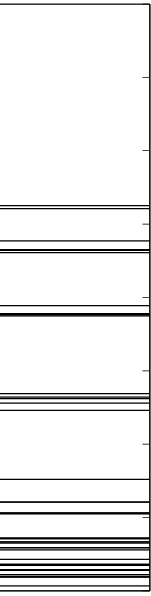


**0**

**1**

**2**

**3**

**4**

**-4**

**-3**

**-2**

**-1**

**0**

**1**

**2**

**3**

**4**

**-4**

**-3**

**-2**

**-1**


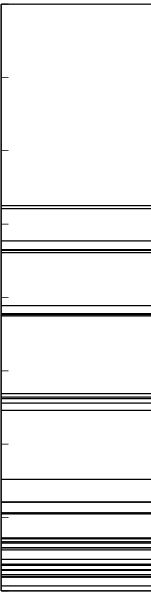

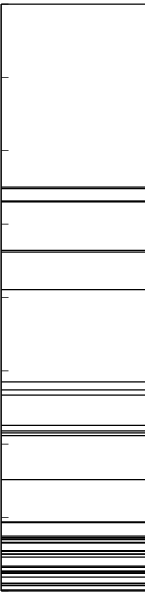


**HOMO**

**Isolated extended model**

**Coupled extended model**

**Figure S4.** Energy level diagrams of the isolated extended model (upper) and the coupled extended model (lower) and equilibrium transmission curves, T(E,V=0), with partial density of state (PDOS) of PDT at the “Atop” configuration having one more Au atom each side of PDT molecule.


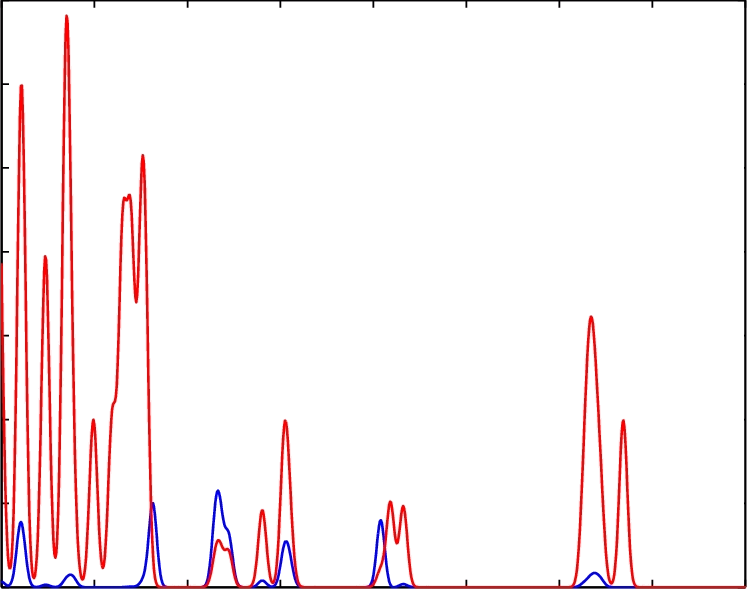

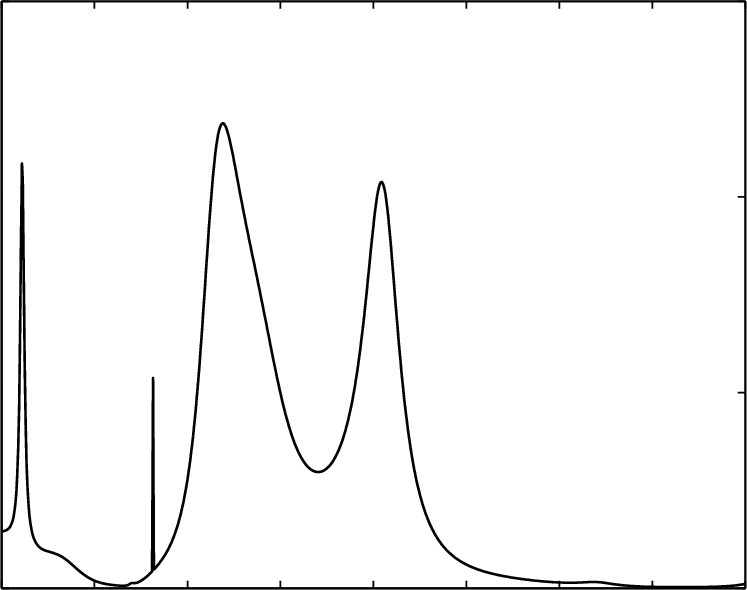

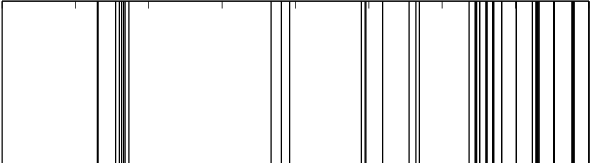


**0**

**1**

**2**

**3**

**4**

**-4**

**-3**

**-2**

**-1**

**Energy, E-Ef(eV)**

**Transmission**

**1.5**

**1.0**

**0.5**

**0.0**

**PDOS**

**0**

**1**

**2**

**3**

**4**

**5**

**7**

**6**

**Framework**

**Au**

**T(E,V=0)**


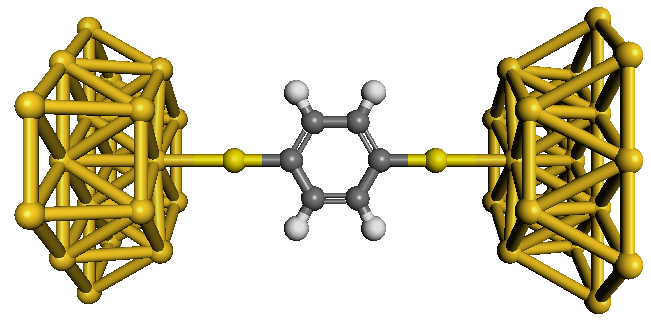


**0**

**1**

**2**

**3**

**4**

**-4**

**-3**

**-2**

**-1**

**0**

**1**

**2**

**3**

**4**

**-4**

**-3**

**-2**

**-1**


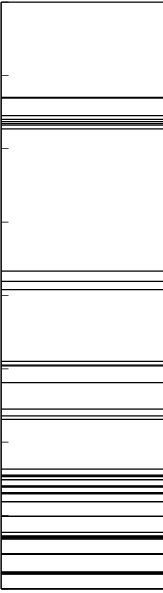

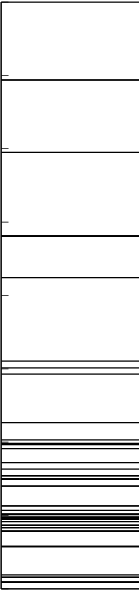


**HOMO**

**Isolated extended model**

**Coupled extended model**

**Figure S5.** Energy level diagrams of the isolated extended model (upper) and the coupled extended model (lower), and equilibrium transmission curves, T(E,V=0), with partial density of state (PDOS) of PDT at the “On-top” configuration.

**0**

**1**

**2**

**3**

**4**

**-4**

**-3**

**-2**

**-1**

**0**

**1**

**2**

**3**

**4**

**-4**

**-3**

**-2**

**-1**


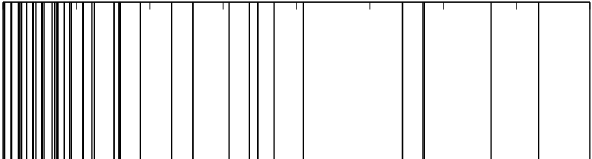

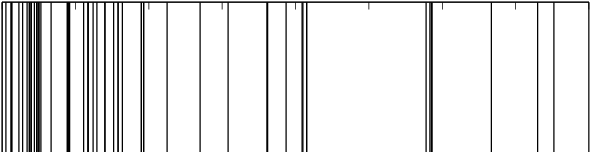


**HOMO**

**LUMO**

**Isolated extended model**

**Coupled extended model**


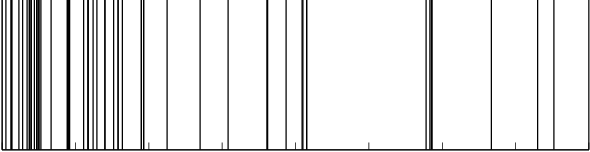

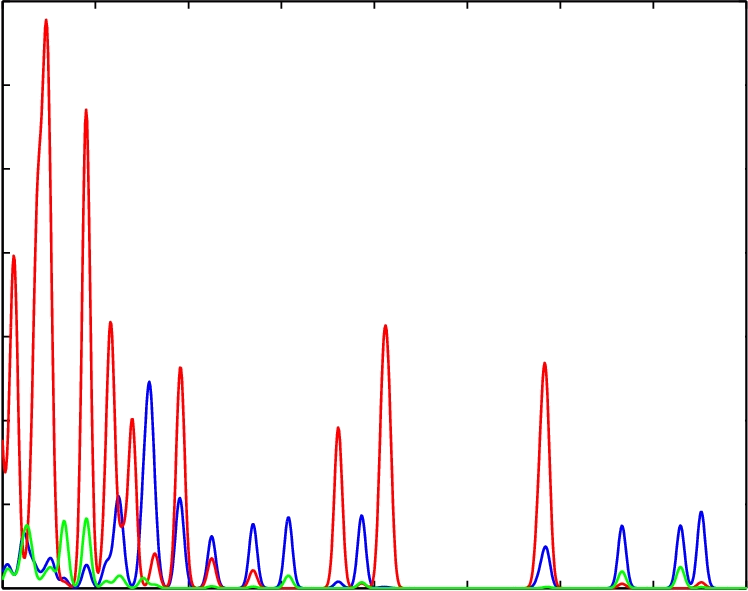

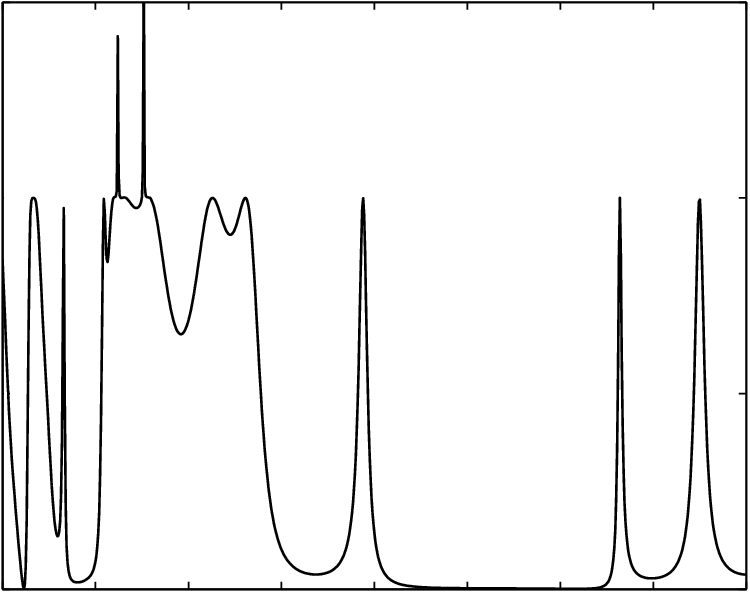

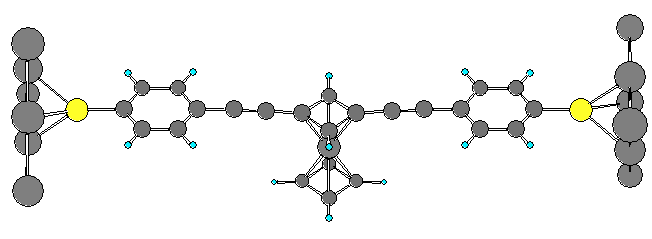


**0**

**1**

**2**

**3**

**4**

**-4**

**-3**

**-2**

**-1**

**Energy, E-Ef(eV)**

**PDOS**

**0**

**1**

**2**

**3**

**4**

**5**

**6**

**7**

**Transmission**

**1.5**

**1.0**

**0.5**

**0.0**

**Ni**

**Framework**

**Au**

**T(E,V=0)**

**Figure S6.** Energy level diagrams of the isolated extended model (upper) and the coupled extended model (lower) and equilibrium transmission curves, T(E,V=0), with partial density of state (PDOS) of NiPTP.


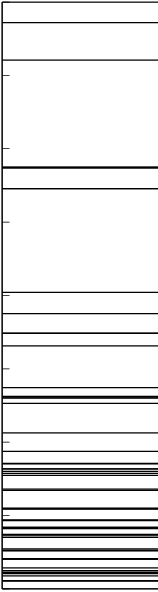

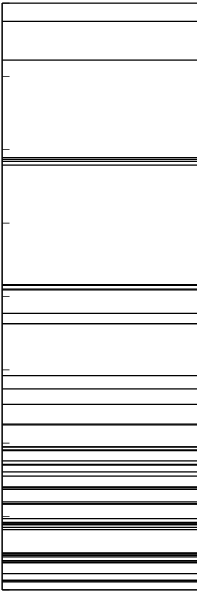


**0**

**1**

**2**

**3**

**4**

**-4**

**-3**

**-2**

**-1**

**0**

**1**

**2**

**3**

**4**

**-4**

**-3**

**-2**

**-1**

**HOMO**

**LUMO**

**Isolated extended model**

**Coupled extended model**

**0**

**1**

**2**

**3**

**4**

**-4**

**-3**

**-2**

**-1**

**Energy, E-Ef(eV)**

**PDOS**

**0**

**1**

**2**

**3**

**4**

**5**

**6**

**7**

**Transmission**

**1.5**

**1.0**

**0.5**

**0.0**


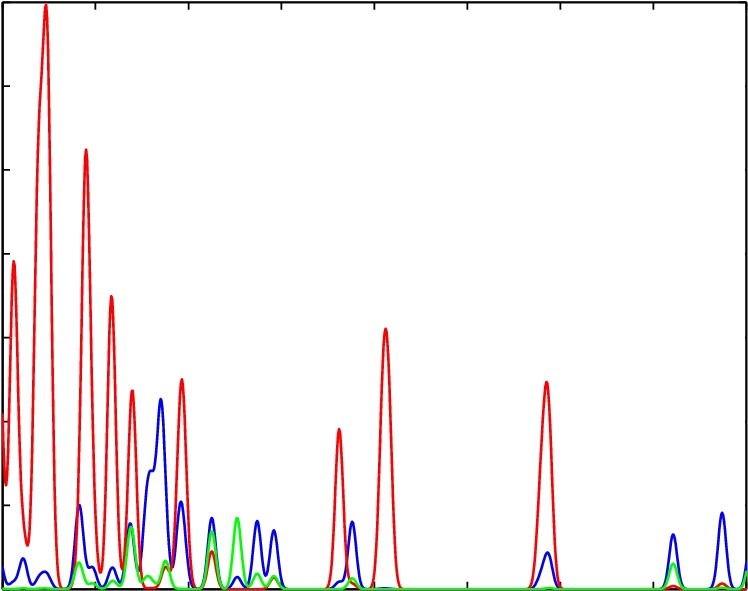

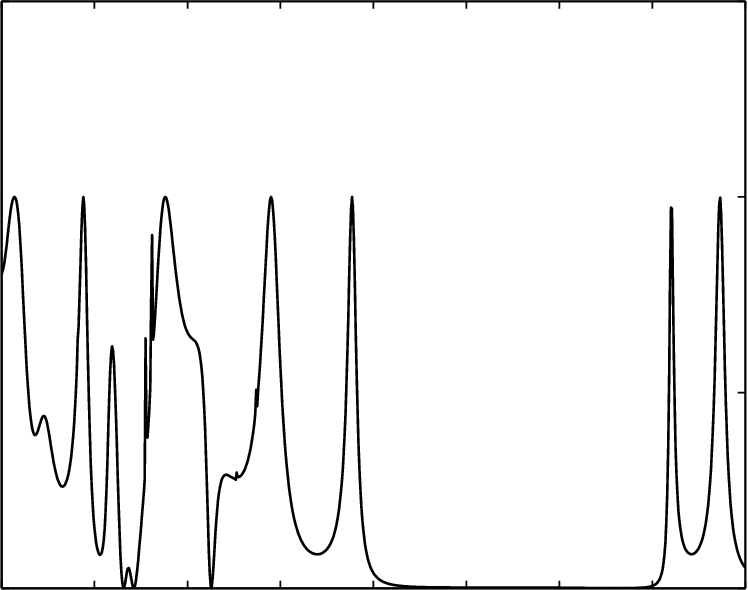


**Co**

**Framework**

**Au**

**T(E,V=0)**


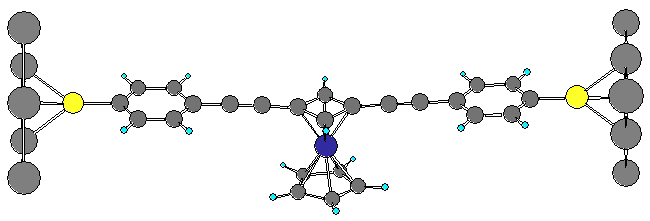

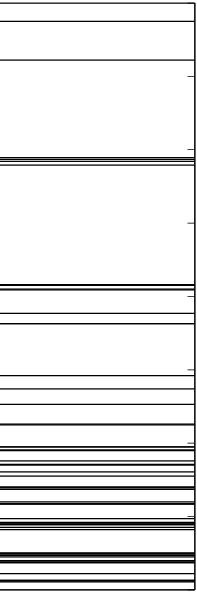


**Figure S7.** Energy level diagrams of the isolated extended model (upper) and the coupled extended model (lower), and equilibrium transmission curves, T(E,V=0), with partial density of state (PDOS) of CoPTP4.


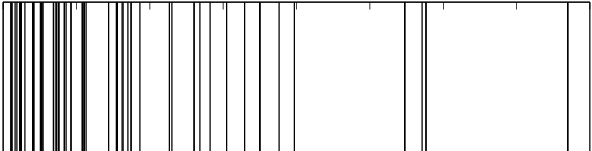


**HOMO**

**LUMO**

**Isolated extended model**

**Coupled extended model**

**0**

**1**

**2**

**3**

**4**

**-4**

**-3**

**-2**

**-1**

**0**

**1**

**2**

**3**

**4**

**-4**

**-3**

**-2**

**-1**


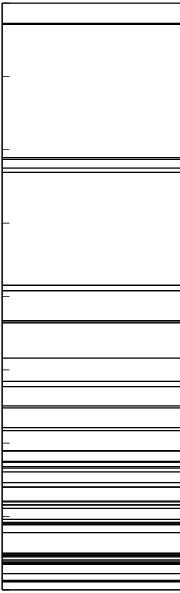


**0**

**1**

**2**

**3**

**4**

**-4**

**-3**

**-2**

**-1**

**Energy, E-Ef(eV)**

**PDOS**

**0**

**1**

**2**

**3**

**4**

**5**

**6**

**7**

**Transmission**

**1.5**

**1.0**

**0.5**

**0.0**


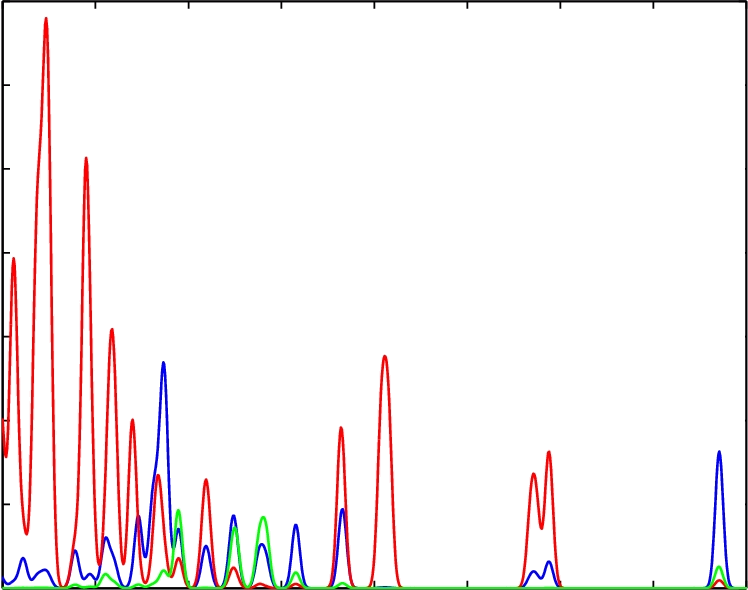

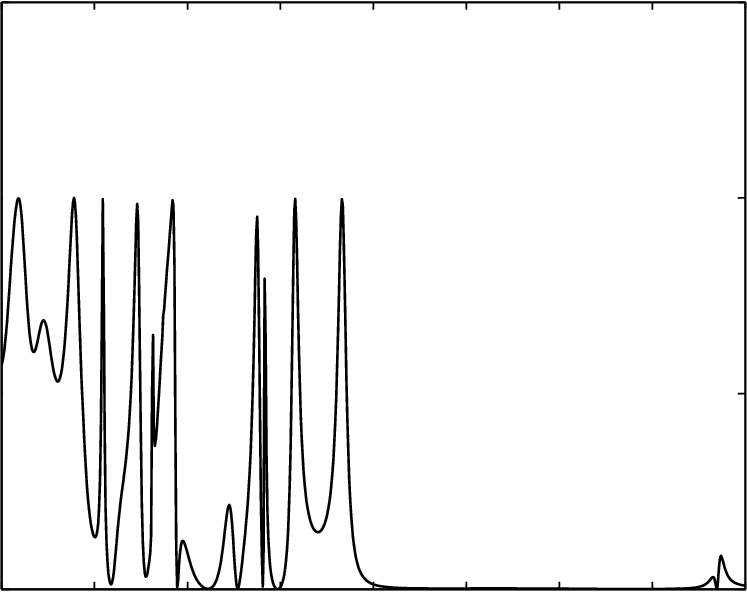

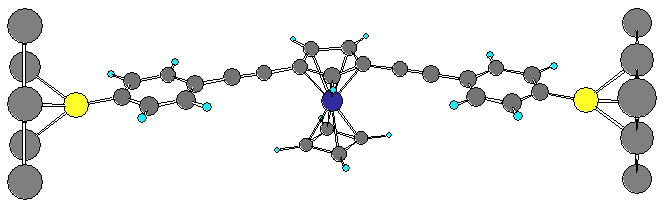


**Co**

**Framework**

**Au**

**T(E,V=0)**


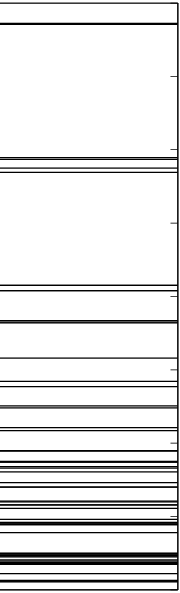


**Figure S8.** Energy level diagrams of the isolated extended model (upper) and the coupled extended model (lower), and equilibrium transmission curves, T(E,V=0), with partial density of state (PDOS) of CoPTP5.

**0**

**1**

**2**

**3**

**4**

**-4**

**-3**

**-2**

**-1**

**0**

**1**

**2**

**3**

**4**

**-4**

**-3**

**-2**

**-1**


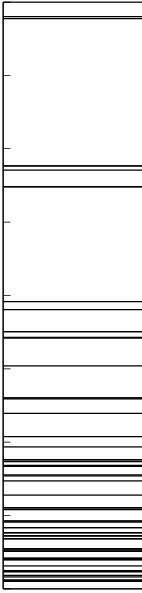

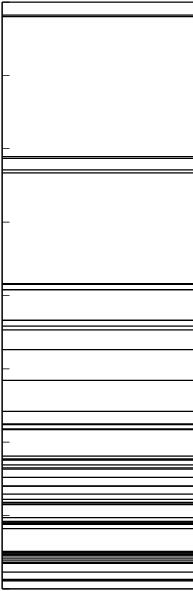


**HOMO**

**LUMO**

**Isolated extended model**

**Coupled extended model**


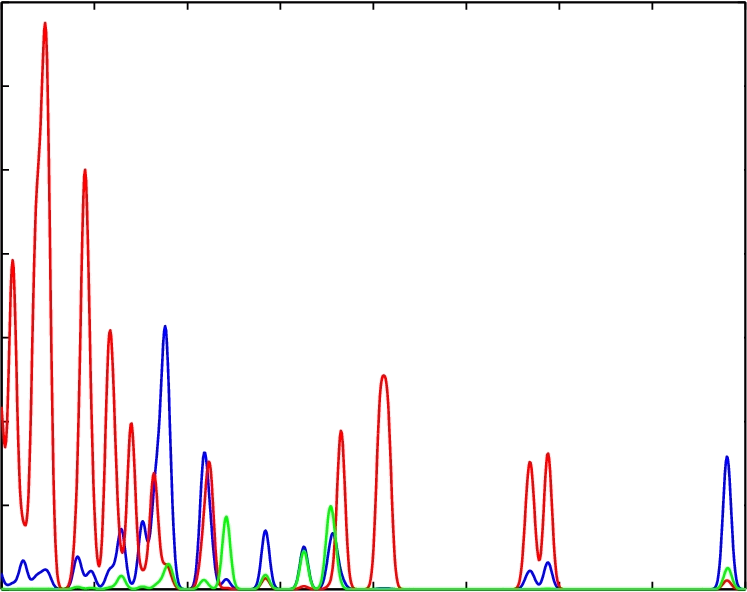

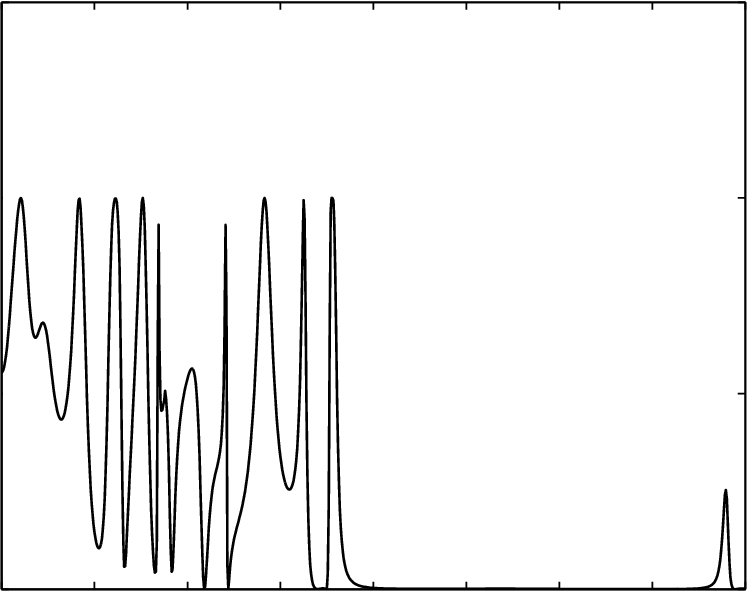


**0**

**1**

**2**

**3**

**4**

**-4**

**-3**

**-2**

**-1**

**Energy, E-Ef(eV)**

**PDOS**

**0**

**1**

**2**

**3**

**4**

**5**

**6**

**7**

**Transmission**

**1.5**

**1.0**

**0.5**

**0.0**


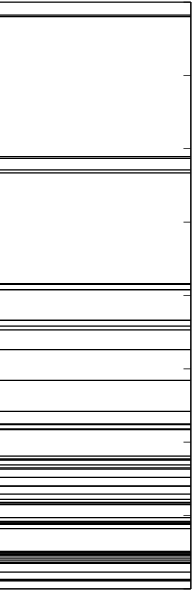

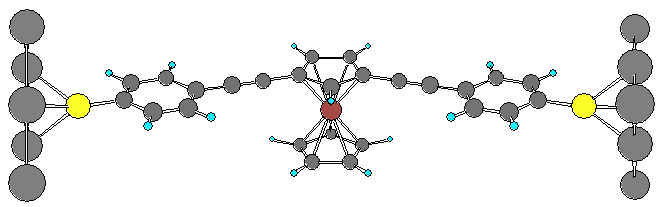


**Fe**

**Framework**

**Au**

**T(E,V=0)**

**Figure S9.** Energy level diagrams of the isolated extended model (upper) and the coupled extended model (lower) and equilibrium transmission curves, T(E,V=0), with partial density of state (PDOS) of FePTP.
